# Supplementary material
Source: HighWire-hosted journal article supplement (https://cmaj.ca/highwire/filestream/77579/field_highwire_adjunct_files/5/200645-res-6-at.pdf)

## Appendix 6 (as supplied by the authors): Forest plot

### ARDS

Figure 1 Effect of corticosteroids on length of ICU stay in ARDS patients

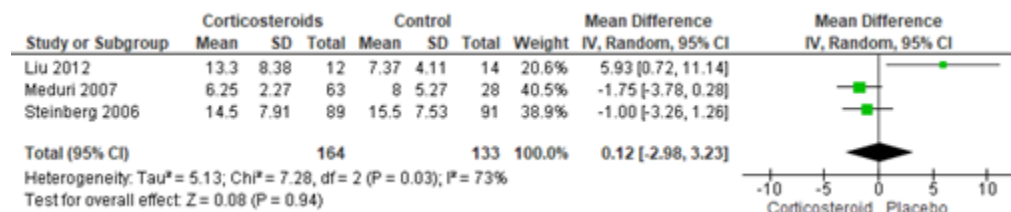

Figure 2 Effect of corticosteroids on length of hospital stay in ARDS patients

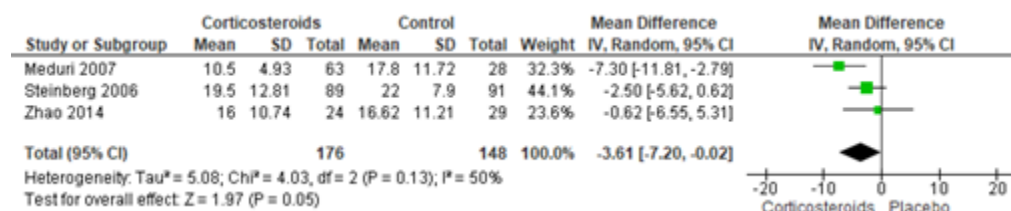

Figure 3 Effect of corticosteroids on duration of mechanical ventilation in ARDS patients

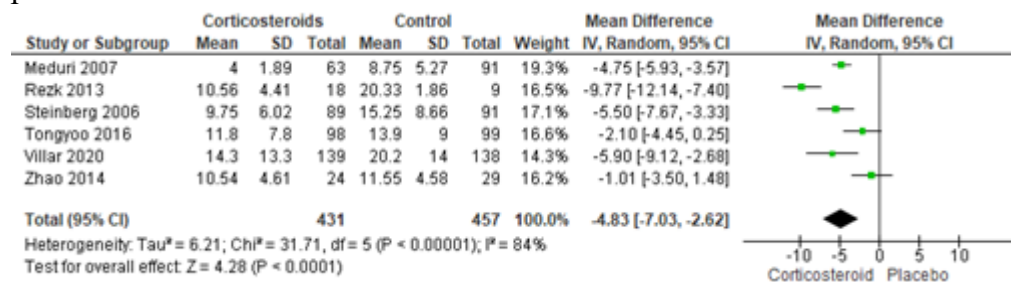

Figure 4 Effect of corticosteroids on serious hyperglycemia in ARDS patients

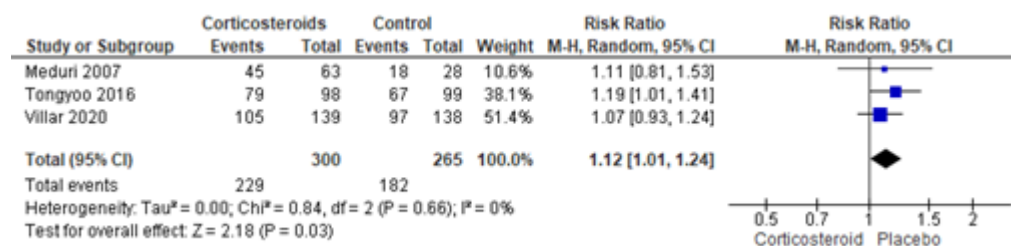

Figure 5 Effect of corticosteroids on neuromuscular weakness in ARDS patients

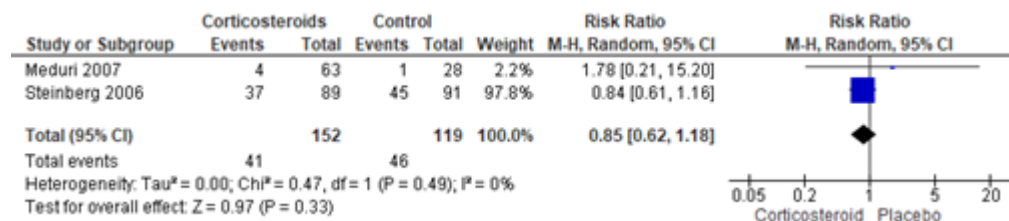

Figure 6 Effect of corticosteroids on gastrointestinal bleeding in ARDS patients

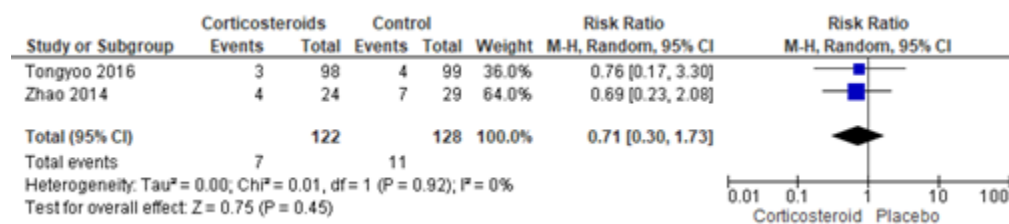

Figure 7 Effect of corticosteroids on super-infection in ARDS patients

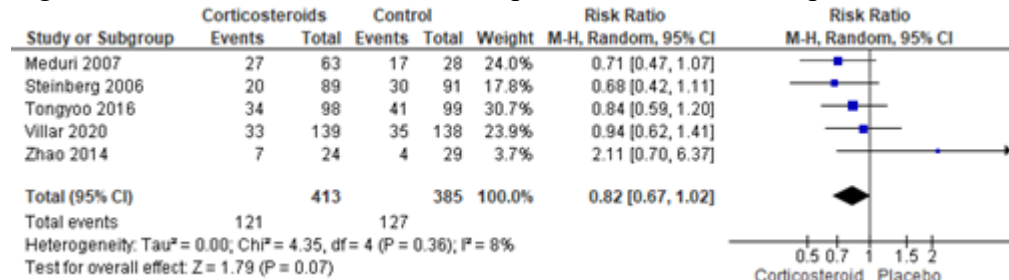

## SARS

Figure 8 Effect of corticosteroids on Median time for CoV RNA to become undetectable in plasma in SARS patients

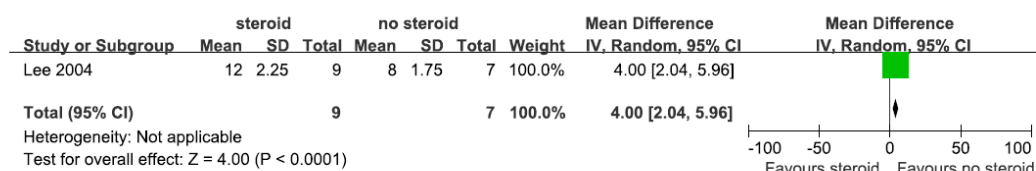

## Influenza

Figure 9 Effect of corticosteroids on superinfection in influenza patients

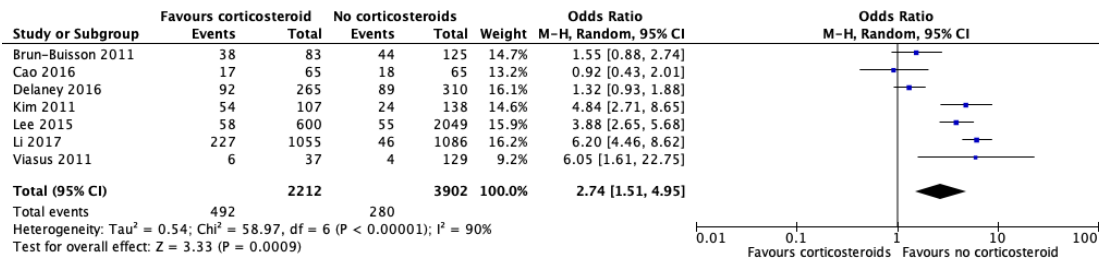

Figure 10 Effect of corticosteroids on rate of mechanical ventilation in influenza patients

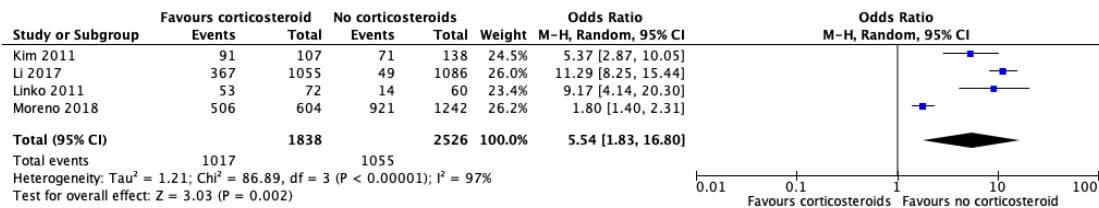

## CAP

Figure 11 Effect of corticosteroids on length of ICU stay in CAP patients

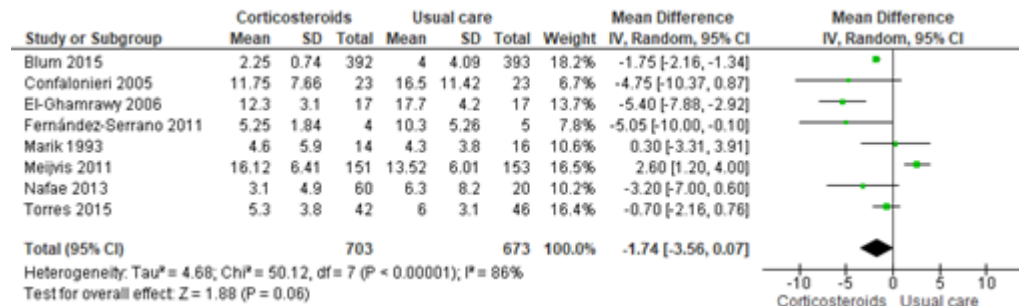

Figure 12 Effect of corticosteroids on length of hospital stay in CAP patients

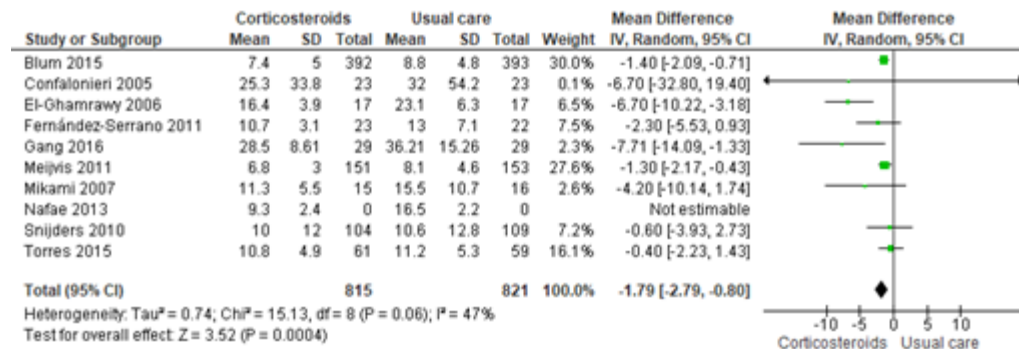

Figure 13 Effect of corticosteroids on the need of mechanical ventilation in CAP

patients

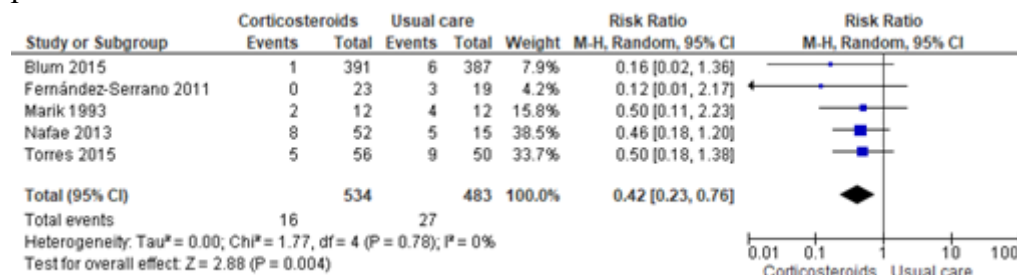

Figure 14 Effect of corticosteroids on duration of mechanical ventilation in CAP patients

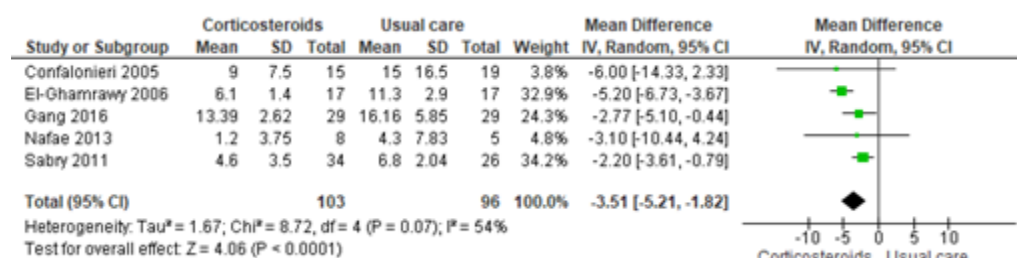

Figure 15 Effect of corticosteroids on serious hyperglycemia in CAP patients

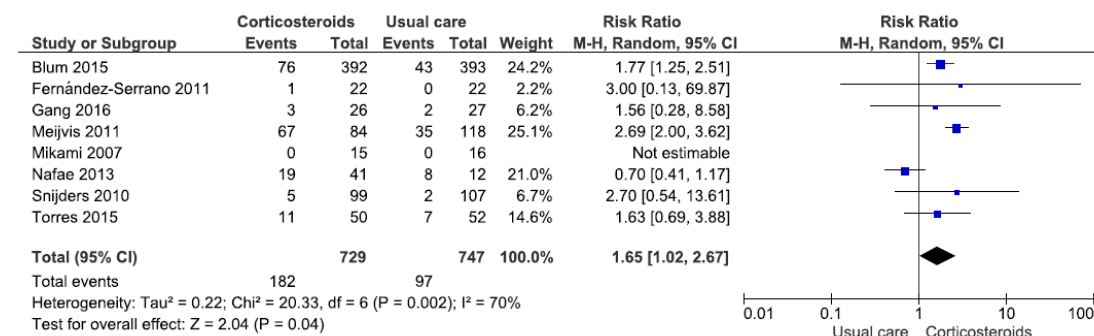

Figure 16 Effect of corticosteroids on gastrointestinal bleeding in CAP patients

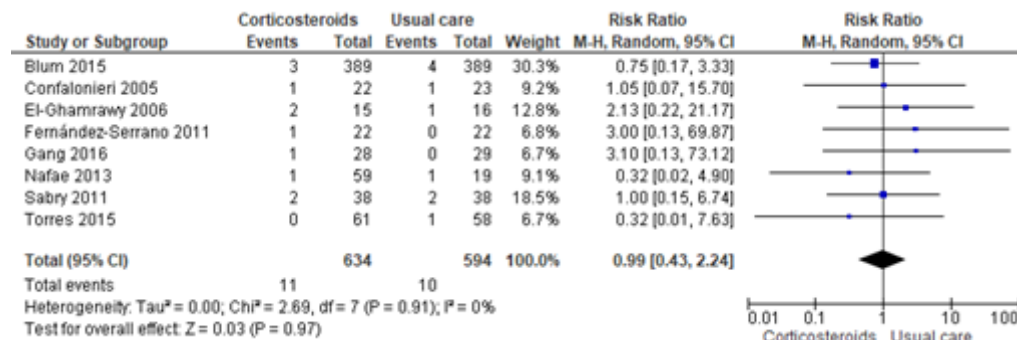

Figure 17 Effect of corticosteroids on neuropsychiatric events in CAP patients

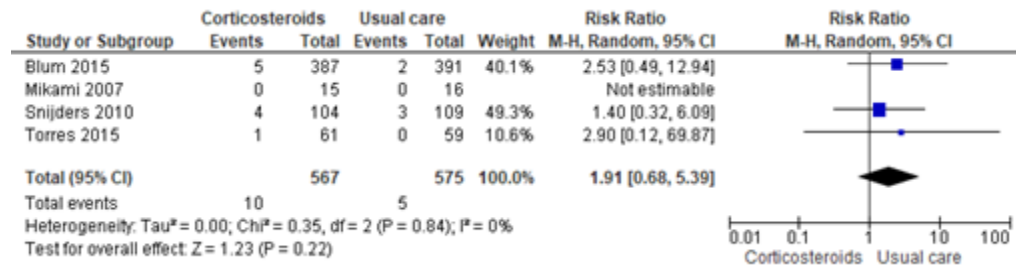

Figure 18 Effect of corticosteroids on super-infection in CAP patients

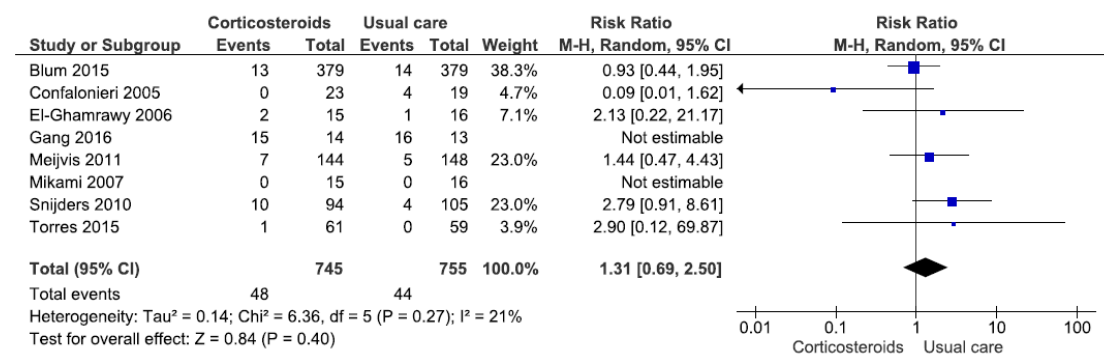

Supplement: 200645-res-6-at.pdf [file 200645-res-6-at.pdf]
